# Supplementary material
Source: PubMed Central journal article supplement (PMC7547248)
Supplement: pnas.2005885117.sapp.pdf [file pnas.2005885117.sapp.pdf]

Supplementary Information for

## **Childhood maltreatment is associated with changes in mitochondrial bioenergetics in maternal, but not in neonatal immune cells**

**Anja M. Gump<sup>1\*</sup>, Christina Boeck<sup>1</sup>, Alexander Behnke<sup>1</sup>, Alexandra M. Bach<sup>1</sup>, Laura Ramo-Fernández<sup>1</sup>, Thilo Welz<sup>2</sup>, Harald Gündel<sup>3</sup>, Iris-Tatjana Kolassa<sup>1§</sup>, Alexander Karabatsiak<sup>1§</sup>**

<sup>1</sup> Clinical & Biological Psychology, Institute of Psychology and Education, Ulm University, Albert-Einstein-Allee 47, 89081 Ulm, Germany.

<sup>2</sup> Institute of Statistics, Ulm University, Helmholtzstraße 20, 89081 Ulm, Germany.

<sup>3</sup> Department of Psychosomatic Medicine and Psychotherapy, University Hospital Ulm, Albert-Einstein-Allee 23, 89081 Ulm, Germany.

§ Authors share authorship in the senior position

\* Correspondence: Anja M. Gump, Clinical & Biological Psychology, Institute of Psychology and Education, Ulm University, Albert-Einstein-Allee 47, 89081 Ulm, Germany, Email: [anja.gump@uni-ulm.de](mailto:anja.gump@uni-ulm.de), Phone: +(49) (0) 731-50 26595

Second contact: Iris-Tatjana Kolassa; [iris.kolassa@uni-ulm.de](mailto:iris.kolassa@uni-ulm.de)

### **This PDF file includes:**

Supplementary text  
Figures S1 to S3  
Tables S1 to S11  
SI References

## Supplementary Information Text

### SI Materials and Methods

#### *Study participants and design*

Study participants were recruited in the Department of Obstetrics and Gynecology at Ulm University Hospital within the scope of the project “My Childhood – Your Childhood”. The aim of this longitudinal study was to investigate psychobiological risk and resilience factors in the intergenerational transmission of CM in a community sample (for more details see 1, 2). Mothers were recruited within one week after parturition ( $M=2.32$  [SD=1.50] days for the cohort of this paper) for study participation (for exclusion criteria and recruitment process see Figure S2). To avoid potential biases of the energetic system due to extreme parturition-related stress, severe complications during parturition as well as severe health problems among mothers and children were considered as exclusion criteria. Consequently, our cohort consisted of healthy mother-newborn dyads after parturition. Prior to the psychodiagnostic interview, written informed consent was obtained from 548 women. Umbilical cord blood (up to 35 ml) was directly transported to the laboratory of the Department of Clinical & Biological Psychology to isolate umbilical blood mononuclear cells (UBMCs). If mothers met any of the exclusion criteria or declined participation (Figure S2), UBMC samples of their newborns were discarded. Until mothers’ written informed consent was obtained, the umbilical cord blood was prepared only for later storage, and no biological analyses were conducted. Except of the isolation of the blood cells and storage of the cells, no further measurements were conducted, and, thus, no participant-related data were collected. Peripheral blood (up to 35 ml) was collected from non-fasting mothers by venipuncture within one week after parturition to isolate peripheral blood mononuclear cells (PBMCs). Participants received a remuneration of 15 € for study participation. All study procedures were in accordance with the Declaration of Helsinki (3) and approved by the Ethics Committee of Ulm University.

#### *Sociodemographic and psychological measures*

During the psychodiagnostic interview, mothers were asked about their sociodemographic and clinical data and to provide retrospective information about their childhood. The German short version of the *Childhood Trauma Questionnaire* (CTQ; 4, 5) was used to assess maternal CM exposure. With respect to the emotionally sensitive puerperium situation of the participating mothers, the CTQ was conducted as an interview by trained psychologists. The CTQ sum score was used as a cumulative measure of CM experiences, defined as CM load (6). Using established CTQ cut-off criteria (7), mothers’ CM experiences were classified into the categories “none”, “mild”, “moderate”, and “severe”. Following the low cut-off, women without CM experiences were classified as CM-, whereas women with at least mild CM experiences in one or more CTQ subscales were categorized as CM+. CM+ mothers and their newborns did not differ from CM- mothers and their newborns with regard to descriptive characteristics, except for the CTQ sum score and the sum scores of the CTQ subscales (Table S1). We did not assess maternal body mass index (BMI) after parturition in our study cohort, as the BMI is not a robust reference measure for mothers shortly after giving birth, since the woman’s body undergoes dynamic physiological changes during pregnancy (8, 9).

#### *Blood sampling and isolation of peripheral blood mononuclear cells.*

Samples of peripheral blood from mothers ( $n=318$ ) and umbilical cord blood from newborns ( $n=238$ ) were drawn into monovettes (Sarstedt, Nürmbrecht, Germany) buffered with Citrate-phosphate-dextrose-adenine (CPDA) to minimize nutritional stress for blood cells and to compensate for possible differences in storage time between blood collection and processing. PBMCs and UBMCs were isolated by Ficoll-Hypaque density-gradient centrifugation (GE Healthcare, Chalfont St Giles, UK) according to the manufacturer’s protocol and stored frozen at  $-80^{\circ}\text{C}$  in cryoprotective freezing medium (dimethyl sulphoxide: Sigma-Aldrich, St. Louis, USA; fetal calf serum (FCS): Sigma-Aldrich; dilution 1:10) until biological analyses.

To control for possible differences in blood cell composition, a small volume of whole blood was collected (2.5 ml) into EDTA-buffered blood collection tubes (Sarstedt) to generate a standard hemogram in the Department of Clinical Chemistry at Ulm University Hospital. The hemogram of both, maternal and umbilical cord blood, was analyzed only in the samples of mothers who provided written informed consent. CM+ mothers and their newborns did not differ from CM- mothers and their newborns with regard to blood cell composition (Table 1).

#### *Mitochondrial respiration in intact cells*

In short, frozen cells were thawed in pre-warmed Phosphate-buffered saline (PBS; Life Technologies, Carlsbad, USA) supplemented with 2% FCS, washed two times by centrifugation at 270 g for 10 min at room temperature. In a small sample, cells were stained with trypan blue to quantify the amount of living cells. Cell samples were resuspended in 4.3 ml freshly thawed mitochondrial respiration medium (Mir05) (10), 2.1 ml of the cell suspension was transferred into each of the two chambers of an air-calibrated O2k Oxygraph (Oroboros Instruments, Innsbruck, Austria) and supplemented with 10  $\mu$ l Sodium pyruvate (2 M stock; Sigma-Aldrich). Real-time oxygen concentration ( $\mu$ M) in the chamber, as well as oxygen flux (pmol O<sub>2</sub>/sec) per million living cells, were recorded over time using the DatLab software 6.1 (Oroboros Instruments). A standardized Substrate-Uncoupler-Inhibitor-Titration (SUIT) protocol (11, 12) was used according to the manufacturer to measure mitochondrial respiration at 37°C. Samples were measured in duplicates and analyses were performed blinded with respect to clinical variables or group assignment. Following the respirometric analysis, 500,000 cells were shock-frozen in liquid nitrogen for measuring the intracellular mitochondrial density.

#### *SUIT Protocol for the measurement of mitochondrial respiration in intact immune cells.*

First, physiological respiration (Routine respiration) was assessed as mitochondrial oxygen consumption of intact peripheral blood mononuclear cells (PBMCs) / umbilical cord blood mononuclear cells (UBMCs). After adding 0.5  $\mu$ l of the *ATP-synthase* inhibitor Oligomycin (5 mM stock; Sigma-Aldrich), Leak respiration, which compensates for proton leak, slippage, and cation cycling over the inner mitochondrial membrane, was measured (11). The difference between Routine respiration and Leak respiration represents the oxygen consumption related to ATP production reflected by the *ATP-synthase* (*Complex V*) activity (ATP-turnover-related respiration). Stepwise titration (first 1  $\mu$ l, followed by 0.5  $\mu$ l steps) of the uncoupler Carbonyl cyanide 4-trifluoromethoxyphenyl hydrazone (FCCP, 1mM stock; Sigma-Aldrich) induced the maximal capacity of the respiratory chain, which indicates the non-physiological maximal Uncoupled respiration that is not limited by the enzyme activity of the *ATP-synthase* (12). Spare respiratory capacity was calculated as the difference between the maximal respiratory capacity and Routine respiration. Thereafter, the addition of 1  $\mu$ l *Complex I*-inhibitor Rotenone (1 mM stock; Sigma-Aldrich) and of 1  $\mu$ l *Complex III*-inhibitor Antimycin A (5 mM stock; Sigma-Aldrich) enables to measure the residual oxygen consumption (ROX). ROX estimates the cellular oxygen consumption linked to oxidative side reactions remaining after the complete blocking of the respiratory chain (11) as well as to technical background noise of the measurements. For evaluation of cellular oxygen consumption related to mitochondrial activity, ROX was subtracted from all other values according to the manufacturer's recommendations (11, 12). Representative example measurements of the samples of one mother and her child are presented in Figure S3.

Averaged values of both oxygraph chambers normalized for the number of living cells in the sample were used for statistical analyses. For further qualitative analysis, flux control ratios were calculated based on the measured respiratory values as internal normalization to control for cell size, cell morphology, and mitochondrial content (11): *Routine control ratio* (Routine respiration / Maximal respiratory capacity); *Leak control ratio* (Leak respiration / Maximal respiratory capacity); *Net routine ratio* (ATP-turnover-related respiration / Maximal respiratory capacity); *Coupling efficiency* (ATP-turnover-related respiration / Routine respiration).

#### *Spectrophotometric assessment of the intracellular mitochondrial density*

For quantifying the density of the mitochondrial network, *citrate synthase* activity (CSA) was determined spectrophotometrically in freshly thawed samples at 30°C using a standardized and established protocol as previously described (13, 14). Samples were measured in duplicates and

mean values were used for statistical analyses. CSA as a marker for mitochondrial density in human PBMCs has been validated via another marker for mitochondrial density, i.e., mtDNA copy number (mtDNAcn). CSA per cell and mtDNAcn showed a high correlation in human PBMCs (15, 16). Parameters from high-resolution respirometry were normalized for CSA and thus for the intracellular mitochondrial density.

#### *Data analysis*

All statistical analyses were performed in R 3.3.3 (R Core Team, 2016). Normal distribution of model residuals was examined with the histogram of standardized residuals, and homogeneity and homoscedasticity were checked by plotting fitted values against standardized residuals. Non-parametric analyses were used where appropriate. Continuous variables of CM+ and CM- group were compared using *t*-tests and Mann–Whitney *U*-tests, or analyses of covariance (ANCOVAs) if additional covariates were included. Categorical data were compared using  $\chi^2$  tests or Fisher's exact tests. Kendall's tau correlation coefficients ( $\tau$ ) were calculated for correlation analyses. Parameters of mitochondrial bioenergetics that differed significantly in group comparisons (CM- vs. CM+) were additionally tested for prediction by CM load using linear regression analyses. The unstandardized (*B*) and standardized ( $\beta$ ) regression coefficients, standard errors (*SE*), as well as related *t*-statistics and *p*-values are reported. Storage time of cryopreserved cells served as a covariate as it may affect mitochondrial functioning (17–19). As immune cell subsets within the PBMC/UBMC fraction (i.e., lymphocytes, monocytes, and dendritic cells) differ in their bioenergetic profiles (20, 21), we considered the percentage of lymphocytes and monocytes in whole blood as additional covariates in the linear regression analyses. All analyses were repeated for the neonatal bioenergetics. In addition, children's biological sex was controlled as a covariate in the linear regression analyses. As recommended (22), in case of non-normal distributed model residuals and/or heteroscedasticity of residuals, we applied MM-estimator-based robust linear regression models using the R-package "robustbase" (23). All reported analyses used a two-tailed significance level set at  $p \leq 0.05$ . For the mitochondrial parameters, *p*-values were adjusted for multiple comparisons according to the Benjamini-Hochberg procedure (i.e., false discovery rate, FDR) (24). Effects of  $0.01 \leq \eta^2_p \leq 0.04$  were considered small,  $0.05 \leq \eta^2_p \leq 0.13$  medium, and  $\eta^2_p > 0.14$  large. For  $\tau$  and  $\beta$ , effects of 0.10-0.22 were considered small, of 0.23-0.35 medium, and of  $> 0.36$  large.

#### *Power analysis for future studies*

In our study, we observed significant CM group effects on maternal routine respiration, ATP-turnover-related respiration, and CSA with effect sizes of  $\eta^2_p = 0.057$ ,  $0.051$ , and  $0.061$ , respectively. Using an ANCOVA (two groups, one covariate,  $\alpha = 0.05$ ), the observed power to detect such effects ranged from  $1-\beta = 0.54$  to  $0.63$  at the given sample size ( $n=105$ ). Accordingly, future studies which aim at replicating effects ranging between  $\eta^2_p = 0.050$  and  $0.065$  (i.e.,  $f = 0.23$ – $0.25$ ) with an ANCOVA and a power of  $1-\beta = 0.80$  would require samples of  $n=142$  to  $187$  participants. With respect to the CSA in newborns, we observed a nonsignificant CM group difference of  $\eta^2_p = 0.039$ . The observed power was relatively low with  $1-\beta = 0.36$  (ANCOVA with two groups, two covariates,  $\alpha = 0.05$ ). To enhance the statistical power on  $1-\beta = 0.80$ , replication studies would require a sample of 273 newborns. Note that sample sizes need to be further enhanced to enable the adjustment of *p*-values for the testing of multiple outcomes.

## Supplementary Figures

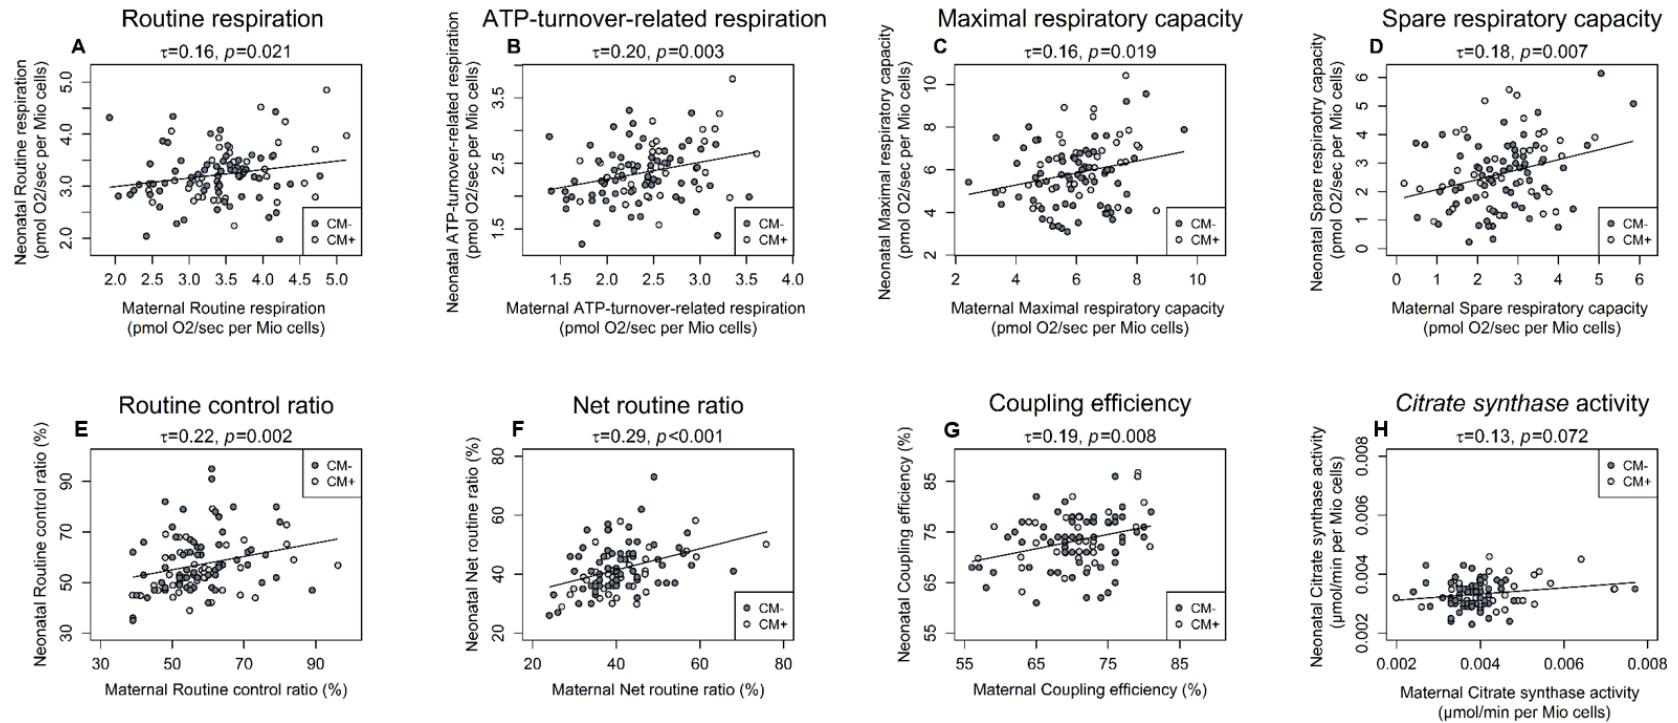

**Fig. S1.** Scatterplots for the graphical illustration of the significant correlations between maternal and neonatal mitochondrial bioenergetics ( $n=102$ ). Maternal and neonatal mitochondrial respiration parameters showed small to medium-sized positive correlations which were significant for Routine respiration (A), ATP-turnover-related respiration (B), Maximal respiratory capacity (C), and Spare respiratory capacity (D), as well as for the flux control ratios Routine control ratio (E), Net routine ratio (F), and Coupling efficiency (G) for the given sample size. Maternal and neonatal *citrate synthase* activity showed a small-sized positive correlation (H). Kendall's tau correlation coefficients ( $\tau$ ) and the corresponding  $p$ -value are depicted.

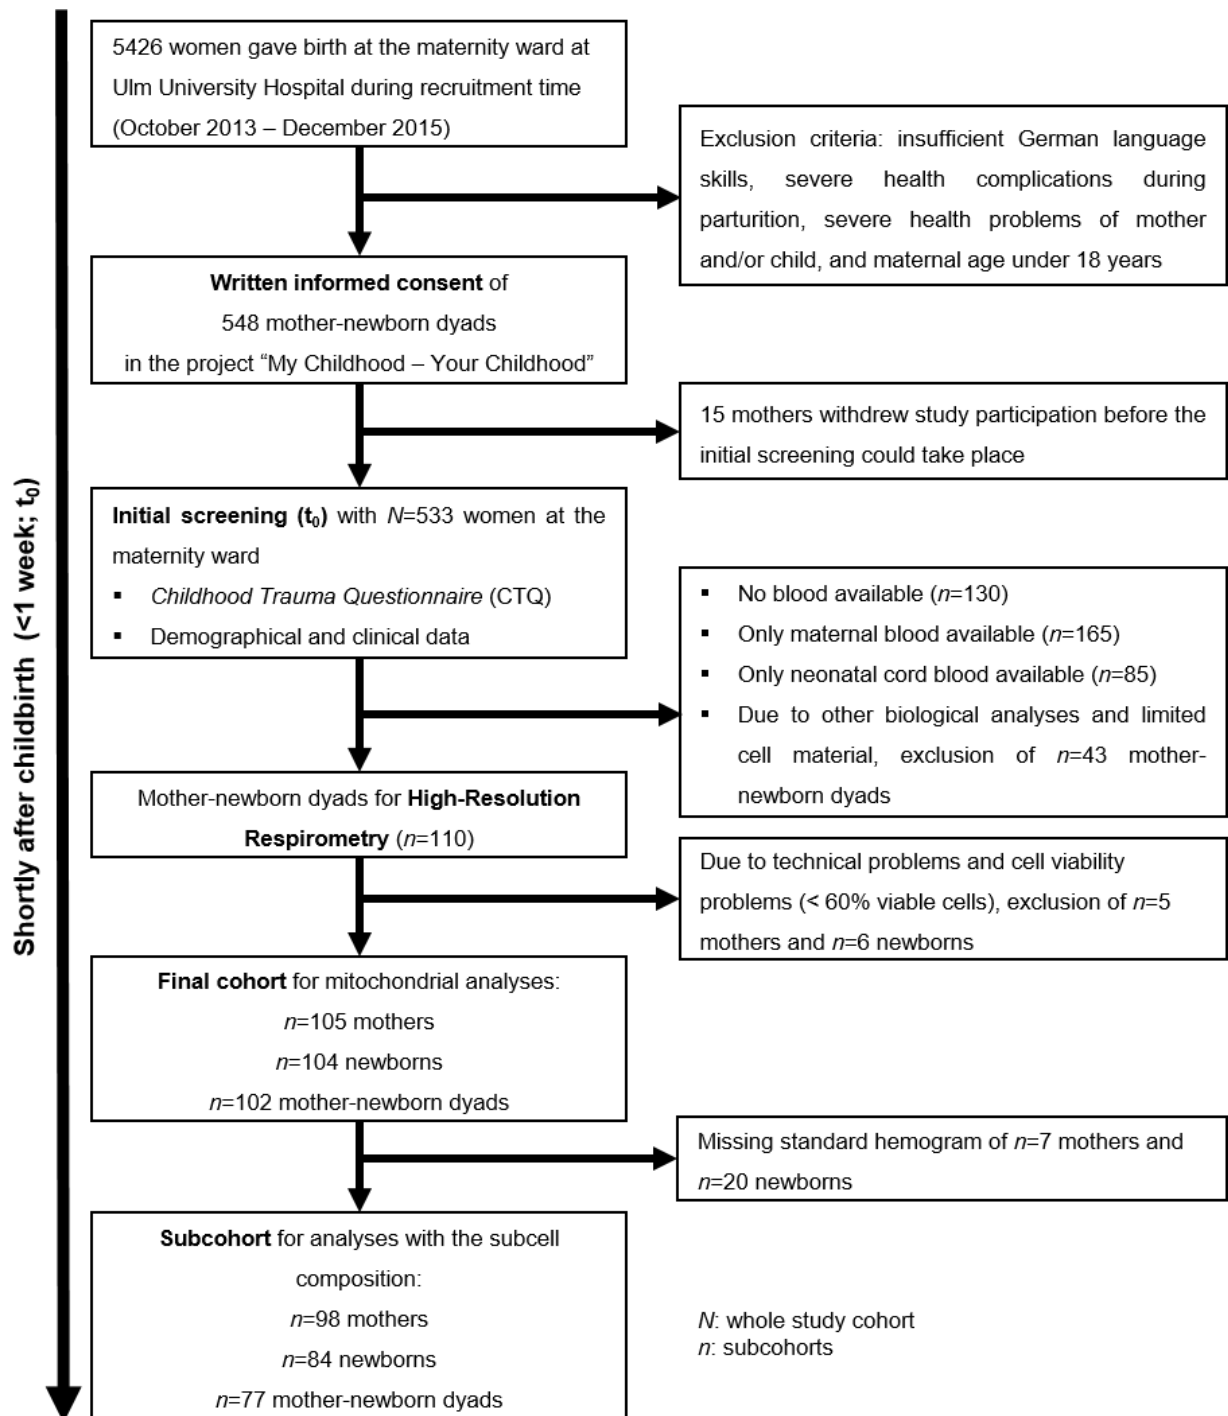

**Fig. S2.** Overview of final sample sizes after applying exclusion criteria in the study “My Childhood – Your Childhood”.

A) Mother

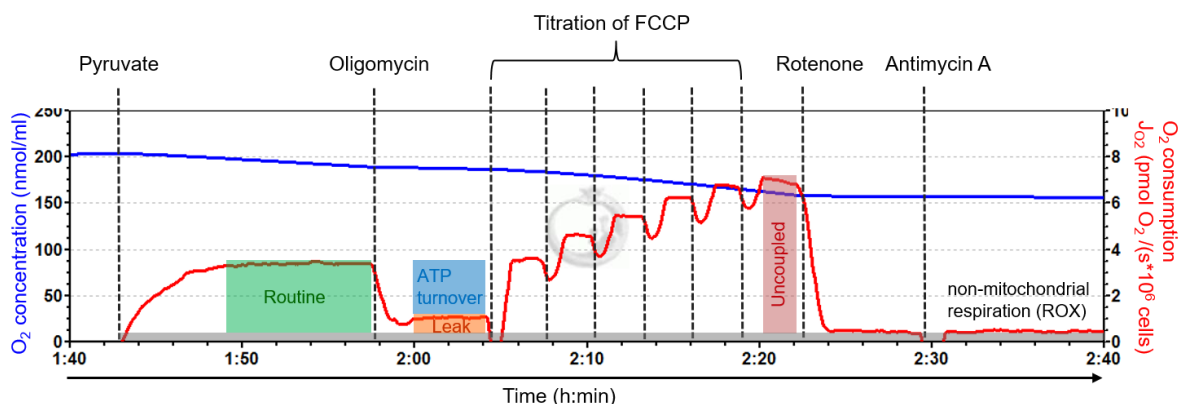

B) Newborn

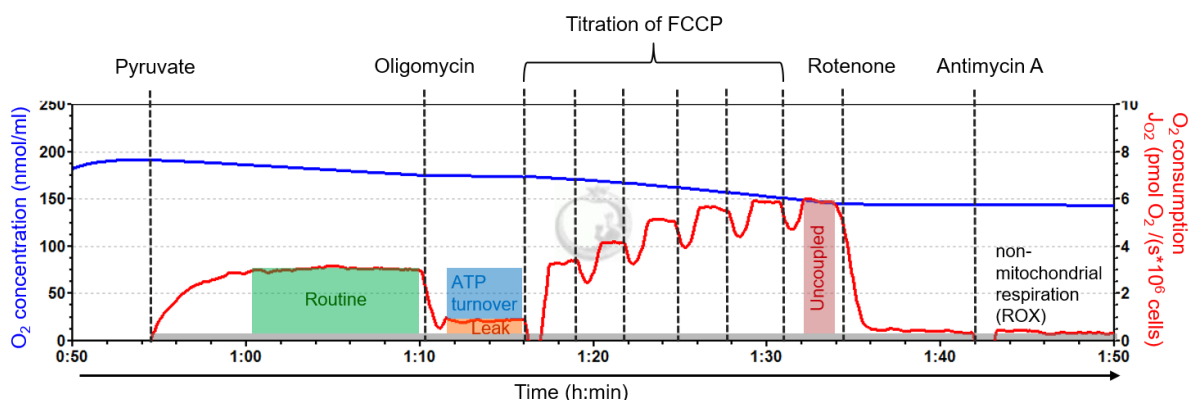

**Fig. S3.** Representative example for the assessment of immunocellular oxygen consumption in intact peripheral blood mononuclear cells (PBMCs) of the mother (A) and in umbilical cord blood mononuclear cells (UBMCs) of the newborn (B) using high-resolution respirometry. The cellular oxygen consumption (red line) of intact PBMCs/UBMCs was assessed by recording the reduction in oxygen concentration (blue line) over time within the air-sealed chambers of an O2k-Oxygraph. Following the measurement of basal mitochondrial oxygen consumption (Routine respiration, marked in green), Leak respiration (marked in orange), ATP-turnover-related respiration (marked in blue), Uncoupled respiration (maximal capacity of the mitochondrial respiratory chain, marked in red) and the residual oxygen consumption (ROX; marked in grey) were assessed using a standardized Substrate-Uncoupler-Inhibitor-Titration (SUIT) protocol (11, 12) for both, PBMCs and UBMCs.

## Supplementary tables

**Table S1.** Sociodemographic and clinical characteristics of mothers and their newborns

| <b>Mothers (n=105)</b>                              |                                                      |                               |                                            |                                            |                                    |          |
|-----------------------------------------------------|------------------------------------------------------|-------------------------------|--------------------------------------------|--------------------------------------------|------------------------------------|----------|
|                                                     | <b>Whole cohort</b><br>(n=105)<br>M [SD] or<br>n (%) | <b>Range</b><br>(Min-<br>Max) | <b>CM-</b><br>(n=67)<br>M [SD] or<br>n (%) | <b>CM+</b><br>(n=38)<br>M [SD] or<br>n (%) | <b>Test statistics<sup>a</sup></b> | <b>p</b> |
| <b>Sociodemographics</b>                            |                                                      |                               |                                            |                                            |                                    |          |
| Age (years)                                         | 33.0 [4.0]                                           | 24-43                         | 33.2 [3.9]                                 | 32.8 [4.3]                                 | $t(103)=-0.44$ ,<br>$d=-0.09$      | 0.662    |
| Maternal ethnicity<br>[Caucasian] <sup>b</sup>      | 104 (99%)                                            | -                             | 67 (100%)                                  | 37 (97%)                                   | -                                  | 0.362    |
| Living in a partnership                             | 105 (100%)                                           | -                             | 67 (100%)                                  | 38 (100%)                                  | -                                  | -        |
| Academic education                                  | 71 (68%)                                             | -                             | 50 (75%)                                   | 21 (55%)                                   | $\chi^2(1)=3.32$ ,<br>$V=0.18$     | 0.069    |
| Pregnancy duration (days)                           | 278 [9]                                              | 251-294                       | 278 [10]                                   | 277 [8]                                    | $U=3682.00$ ,<br>$r=-0.09$         | 0.378    |
| Vaginal delivery <sup>c</sup>                       | 80 (77%)                                             | -                             | 50 (76%)                                   | 30 (79%)                                   | $\chi^2(1)=0.02$ ,<br>$V=0.01$     | 0.897    |
| <b>Psychological &amp; clinical characteristics</b> |                                                      |                               |                                            |                                            |                                    |          |
| Lifetime psychiatric disorder                       | 24 (23%)                                             | -                             | 12 (18%)                                   | 12 (32%)                                   | $\chi^2(1)=1.85$ ,<br>$V=0.13$     | 0.174    |
| Lifetime intake of<br>psychotropic medication       | 26 (25%)                                             | -                             | 15 (22%)                                   | 11 (29%)                                   | $\chi^2(1)=0.26$ ,<br>$V=0.05$     | 0.608    |
| <b>CTQ sum score</b>                                | 32.3 [10.4]                                          | 25-85                         | 27.0 [2.0]                                 | 41.7 [12.6]                                | $U=2325.50$ ,<br>$r=0.80$          | <0.001   |
| Emotional abuse sum score                           | 6.7 [2.8]                                            | 5-18                          | 5.6 [0.8]                                  | 8.7 [3.9]                                  | $U=2843.00$ ,<br>$r=0.49$          | <0.001   |
| Physical abuse sum score                            | 5.7 [2.3]                                            | 5-25                          | 5.1 [0.2]                                  | 6.8 [3.7]                                  | $U=3069.00$ ,<br>$r=0.46$          | <0.001   |
| Sexual abuse sum score                              | 6.0 [3.4]                                            | 5-23                          | 5.0 [0]                                    | 7.8 [5.2]                                  | $U=3149.00$ ,<br>$r=0.47$          | <0.001   |
| Emotional neglect sum<br>score                      | 8.4 [4.0]                                            | 5-21                          | 6.3 [1.5]                                  | 12.0 [4.5]                                 | $U=2593.50$ ,<br>$r=0.64$          | <0.001   |
| Physical neglect sum score                          | 5.5 [1.5]                                            | 5-12                          | 5.0 [0.2]                                  | 6.4 [2.2]                                  | $U=3052.50$ ,<br>$r=0.48$          | <0.001   |
| <b>Newborns (n=104)</b>                             |                                                      |                               |                                            |                                            |                                    |          |
|                                                     | <b>Whole cohort</b><br>(n=104)<br>M [SD] or<br>n (%) | <b>Range</b><br>(Min-<br>Max) | <b>CM-</b><br>(n=65)<br>M [SD] or<br>n (%) | <b>CM+</b><br>(n=39)<br>M [SD] or<br>n (%) | <b>Test statistics<sup>a</sup></b> | <b>p</b> |
| Sex (male)                                          | 63 (61%)                                             | -                             | 40 (62%)                                   | 23 (59%)                                   | $\chi^2(1)=0.003$ ,<br>$V=0.01$    | 0.959    |
| Birth weight (kg)                                   | 3.36 [0.47]                                          | 2.42-4.63                     | 3.36 [0.48]                                | 3.36 [0.46]                                | $t(102)=0.02$ ,<br>$d=0.004$       | 0.985    |
| Gestational age (days)                              | 278 [9]                                              | 251-294                       | 279 [9]                                    | 278 [8]                                    | $U=3519.00$ ,<br>$r=-0.07$         | 0.471    |

CM: Childhood maltreatment; CM-: Women without CM experiences; CM+: Women with mild to severe CM experiences; CTQ: *Childhood Trauma Questionnaire*.

<sup>a</sup> Two-tailed Student *t*-tests/ Mann-Whitney *U*-tests/  $\chi^2$ -tests/ Fisher's exact tests were calculated where appropriate. CM- group as reference group. As effect size measure Cohen's *d*, *r*, or Cramer's *V* is reported.

<sup>b</sup> One study participant of North American origin

<sup>c</sup> *n* = 104, one missing in CM-group.



**Table S2.** Biological raw data for mitochondrial respiration of mothers and their newborns without ROX correction

| <b>Mothers (n=105)</b>                                                  |                                          |                           |                                |                               |                                |                               |
|-------------------------------------------------------------------------|------------------------------------------|---------------------------|--------------------------------|-------------------------------|--------------------------------|-------------------------------|
|                                                                         | <b>Whole cohort</b><br>(n=105)<br>M [SD] | <b>Range</b><br>(Min-Max) | <b>CM-</b><br>(n=67)<br>M [SD] | <b>Range CM-</b><br>(Min-Max) | <b>CM+</b><br>(n=38)<br>M [SD] | <b>Range CM+</b><br>(Min-Max) |
| <b>Mitochondrial respiration (pmol O<sub>2</sub>/sec per Mio cells)</b> |                                          |                           |                                |                               |                                |                               |
| Routine respiration                                                     | 3.66 [0.70]                              | 2.25 – 5.25               | 3.56 [0.69]                    | 2.25 – 5.24                   | 3.84 [0.69]                    | 2.51 – 5.25                   |
| Leak respiration                                                        | 1.25 [0.33]                              | 0.60 – 2.45               | 1.22 [0.34]                    | 0.60 – 2.45                   | 1.29 [0.31]                    | 0.80 – 2.22                   |
| ATP-turnover-related respiration                                        | 2.41 [0.48]                              | 1.38 – 3.61               | 2.34 [0.47]                    | 1.38 – 3.53                   | 2.55 [0.46]                    | 1.71 – 3.61                   |
| Maximal respiratory capacity                                            | 6.28 [1.27]                              | 2.86 – 9.64               | 6.17 [1.32]                    | 2.86 – 9.64                   | 6.46 [1.18]                    | 3.86 – 8.86                   |
| Spare respiratory capacity                                              | 2.62 [1.06]                              | 0.18 – 5.85               | 2.62 [1.07]                    | 0.48 – 5.85                   | 2.62 [1.07]                    | 0.18 – 4.90                   |
| Residual oxygen consumption (ROX)                                       | 0.24 [0.18]                              | 0.00 – 0.70               | 0.25 [0.19]                    | 0.00 – 0.70                   | 0.22 [0.17]                    | 0.00 – 0.62                   |
| <b>Newborns (n=104)</b>                                                 |                                          |                           |                                |                               |                                |                               |
|                                                                         | <b>Whole cohort</b><br>(n=104)<br>M [SD] | <b>Range</b><br>(Min-Max) | <b>CM-</b><br>(n=65)<br>M [SD] | <b>Range CM-</b><br>(Min-Max) | <b>CM+</b><br>(n=39)<br>M [SD] | <b>Range CM+</b><br>(Min-Max) |
| <b>Mitochondrial respiration (pmol O<sub>2</sub>/sec per Mio cells)</b> |                                          |                           |                                |                               |                                |                               |
| Routine respiration                                                     | 3.48 [0.55]                              | 2.22 – 5.01               | 3.43 [0.53]                    | 2.22 – 5.01                   | 3.57 [0.57]                    | 2.37 – 4.98                   |
| Leak respiration                                                        | 1.12 [0.24]                              | 0.73 – 2.10               | 1.11 [0.25]                    | 0.73 – 2.10                   | 1.13 [0.24]                    | 0.79 – 1.74                   |
| ATP-turnover-related respiration                                        | 2.36 [0.44]                              | 1.27 – 3.79               | 2.32 [0.43]                    | 1.27 – 3.31                   | 2.43 [0.46]                    | 1.56 – 3.79                   |
| Maximal respiratory capacity                                            | 6.08 [1.44]                              | 3.28 – 10.55              | 5.91 [1.38]                    | 3.28 – 9.69                   | 6.37 [1.51]                    | 3.71 – 10.55                  |
| Spare respiratory capacity                                              | 2.60 [1.22]                              | 0.23 – 6.14               | 2.48 [1.21]                    | 0.23 – 6.14                   | 2.80 [1.24]                    | 0.93 – 5.57                   |
| Residual oxygen consumption (ROX)                                       | 0.26 [0.18]                              | 0.02 – 0.69               | 0.25 [0.16]                    | 0.02 – 0.69                   | 0.27 [0.20]                    | 0.05 – 0.63                   |

**Table S3.** Mitochondrial bioenergetics in newborns: Mitochondrial raw data of male and female newborns

|                                                                         | <b>Male newborns</b><br>(n=63)<br>M [SD] | <b>Female newborns</b><br>(n=41)<br>M [SD] |
|-------------------------------------------------------------------------|------------------------------------------|--------------------------------------------|
| <b>Mitochondrial respiration (pmol O<sub>2</sub>/sec per Mio cells)</b> |                                          |                                            |
| Routine respiration                                                     | 3.12 [0.54]                              | 3.37 [0.51]                                |
| Leak respiration                                                        | 0.87 [0.21]                              | 0.85 [0.21]                                |
| ATP-turnover-related respiration                                        | 2.25 [0.42]                              | 2.53 [0.44]                                |
| Maximal respiratory capacity                                            | 5.61 [1.47]                              | 6.14 [1.50]                                |
| Spare respiratory capacity                                              | 2.49 [1.20]                              | 2.77 [1.25]                                |
| Residual oxygen consumption (ROX)                                       | 0.28 [0.19]                              | 0.23 [0.16]                                |
| <b>Mitochondrial density (μmol/min per Mio cells)</b>                   |                                          |                                            |
| <i>Citrate synthase</i> activity                                        | 0.0034 [0.0005]                          | 0.0033 [0.0004]                            |

Parameters for mitochondrial respiration are presented corrected for residual oxygen consumption (ROX). For statistics see table S4.

**Table S4.** Mitochondrial bioenergetics in newborns: Results of ANCOVAs concerning the group comparisons of mitochondrial respiration and density in female ( $n=41$ ) and male ( $n=63$ ) newborns accounting for the storage time of cryopreserved cells as a covariate

| Outcome variable                                                                 | Predictor                                                                                       | B (SE)                                             | 95%CI (B)                                            | F (1,101) | $\eta^2_{\text{partial}}$ | p            | p <sub>FDR</sub> |
|----------------------------------------------------------------------------------|-------------------------------------------------------------------------------------------------|----------------------------------------------------|------------------------------------------------------|-----------|---------------------------|--------------|------------------|
| <b>Routine respiration</b> (pmol O <sub>2</sub> /sec per Mio cells)              | Intercept                                                                                       | 3.01 (0.28)                                        | [2.46, 3.56]                                         | 118.30    |                           | <0.001       | <0.001           |
|                                                                                  | Female sex                                                                                      | 0.26 (0.11)                                        | [0.05, 0.47]                                         | 5.77      | 0.053                     | <b>0.018</b> | <b>0.036</b>     |
|                                                                                  | Storage time of cryopreserved cells                                                             | 9.86*10 <sup>-5</sup><br>(2.35*10 <sup>-4</sup> )  | [-3.67*10 <sup>-4</sup> ,<br>5.64*10 <sup>-4</sup> ] | 0.18      | 0.002                     | 0.675        | 0.759            |
|                                                                                  | Overall model statistics: $F(2,101)=2.89$ , $p=0.060$ , $R^2=0.054$ , $R^2_{\text{adj}}=0.035$  |                                                    |                                                      |           |                           |              |                  |
| <b>Leak respiration</b> (pmol O <sub>2</sub> /sec per Mio cells)                 | Intercept                                                                                       | 0.56 (0.09)                                        | [0.38, 0.73]                                         | 40.11     |                           | <0.001       | <0.001           |
|                                                                                  | Female sex                                                                                      | -2.43*10 <sup>-3</sup> (0.04)                      | [-0.08, 0.08]                                        | 0.004     | <0.001                    | 0.951        | 0.951            |
|                                                                                  | Storage time of cryopreserved cells                                                             | 2.60*10 <sup>-4</sup><br>(7.20*10 <sup>-5</sup> )  | [1.17*10 <sup>-4</sup> ,<br>4.03*10 <sup>-4</sup> ]  | 13.00     | 0.114                     | <0.001       | 0.001            |
|                                                                                  | Overall model statistics†: $F(2,101)=6.64$ , $p=0.002$ , $R^2=0.089$ , $R^2_{\text{adj}}=0.071$ |                                                    |                                                      |           |                           |              |                  |
| <b>ATP-turnover related respiration</b> (pmol O <sub>2</sub> /sec per Mio cells) | Intercept                                                                                       | 2.42 (0.22)                                        | [1.98, 2.86]                                         | 118.69    |                           | <0.001       | <0.001           |
|                                                                                  | Female sex                                                                                      | 0.26 (0.09)                                        | [0.09, 0.44]                                         | 9.40      | 0.094                     | <b>0.003</b> | <b>0.008</b>     |
|                                                                                  | Storage time of cryopreserved cells                                                             | -1.47*10 <sup>-4</sup><br>(1.89*10 <sup>-4</sup> ) | [-5.21*10 <sup>-4</sup> ,<br>2.27*10 <sup>-4</sup> ] | 0.61      | 0.006                     | 0.436        | 0.523            |
|                                                                                  | Overall model statistics: $F(2,101)=5.54$ , $p=0.005$ , $R^2=0.099$ , $R^2_{\text{adj}}=0.081$  |                                                    |                                                      |           |                           |              |                  |
| <b>Maximal respiratory capacity</b> (pmol O <sub>2</sub> /sec per Mio cells)     | Intercept                                                                                       | 4.02 (0.76)                                        | [2.51, 5.53]                                         | 27.85     |                           | <0.001       | <0.001           |
|                                                                                  | Female sex                                                                                      | 0.64 (0.30)                                        | [0.05, 1.22]                                         | 4.61      | 0.032                     | <b>0.034</b> | 0.051            |
|                                                                                  | Storage time of cryopreserved cells                                                             | 1.39*10 <sup>-3</sup><br>(6.46*10 <sup>-4</sup> )  | [1.08*10 <sup>-4</sup> ,<br>2.67*10 <sup>-3</sup> ]  | 4.62      | 0.044                     | 0.034        | 0.051            |
|                                                                                  | Overall model statistics: $F(2,101)=3.97$ , $p=0.022$ , $R^2=0.073$ , $R^2_{\text{adj}}=0.055$  |                                                    |                                                      |           |                           |              |                  |
| <b>Spare respiratory capacity</b> (pmol O <sub>2</sub> /sec per Mio cells)       | Intercept                                                                                       | 1.02 (0.62)                                        | [-0.22, 2.25]                                        | 2.65      |                           | 0.107        | 0.148            |
|                                                                                  | Female sex                                                                                      | 0.38 (0.24)                                        | [-0.10, 0.86]                                        | 2.43      | 0.014                     | 0.122        | 0.157            |
|                                                                                  | Storage time of cryopreserved cells                                                             | 1.29*10 <sup>-3</sup><br>(5.29*10 <sup>-4</sup> )  | [2.39*10 <sup>-4</sup> ,<br>2.34*10 <sup>-3</sup> ]  | 5.93      | 0.055                     | 0.017        | 0.036            |
|                                                                                  | Overall model statistics: $F(2,101)=3.66$ , $p=0.029$ , $R^2=0.068$ , $R^2_{\text{adj}}=0.049$  |                                                    |                                                      |           |                           |              |                  |
| <b>Citrate synthase activity</b> (μmol/min per Mio cells)                        | Intercept                                                                                       | 2.82*10 <sup>-3</sup><br>(2.37*10 <sup>-4</sup> )  | [2.35*10 <sup>-3</sup> ,<br>3.28*10 <sup>-3</sup> ]  | 141.67    |                           | <0.001       | <0.001           |
|                                                                                  | Female sex                                                                                      | -2.58*10 <sup>-5</sup><br>(9.20*10 <sup>-5</sup> ) | [-2.08*10 <sup>-4</sup> ,<br>1.57*10 <sup>-4</sup> ] | 0.08      | 0.004                     | 0.779        | 0.825            |
|                                                                                  | Storage time of cryopreserved cells                                                             | 4.68*10 <sup>-7</sup><br>(2.01*10 <sup>-7</sup> )  | [6.97*10 <sup>-8</sup> ,<br>8.65*10 <sup>-7</sup> ]  | 5.43      | 0.051                     | 0.022        | 0.040            |
|                                                                                  | Overall model statistics: $F(2,101)=2.94$ , $p=0.057$ , $R^2=0.055$ , $R^2_{\text{adj}}=0.036$  |                                                    |                                                      |           |                           |              |                  |

Significant sex effects are given in bold. Robust models (†) where appropriate. Male newborns as reference group. *P*-values were adjusted for multiple comparisons according to the Benjamini-Hochberg procedure (i.e., false discovery rate, FDR) (24).

**Table S5.** Results of ANCOVAs concerning the group comparisons of mitochondrial respiration and density in CM- and CM+ women accounting for the storage time of cryopreserved cells as a covariate ( $n=105$ )

| Outcome variable                                                                 | Predictor                                                                                        | <i>B</i> (SE)                                   | 95%CI ( <i>B</i> )                                 | <i>F</i> (1,102) | $\eta^2_{\text{partial}}$ | <i>p</i>     | <i>p</i> <sub>FDR</sub> |
|----------------------------------------------------------------------------------|--------------------------------------------------------------------------------------------------|-------------------------------------------------|----------------------------------------------------|------------------|---------------------------|--------------|-------------------------|
| <b>Routine respiration</b> (pmol O <sub>2</sub> /sec per Mio cells)              | Intercept                                                                                        | 3.98 (0.31)                                     | [3.37, 4.59]                                       | 166.36           |                           | <0.001       | <0.001                  |
|                                                                                  | CM group                                                                                         | 0.34 (0.13)                                     | [0.09, 0.59]                                       | 7.11             | 0.057                     | <b>0.009</b> | <b>0.019</b>            |
|                                                                                  | Storage time of cryopreserved cells                                                              | -6.08*10 <sup>-4</sup> (2.72*10 <sup>-4</sup> ) | [-0.001, -6.83*10 <sup>-5</sup> ]                  | 4.99             | 0.047                     | 0.028        | 0.047                   |
|                                                                                  | Overall model statistics: $F(2,102)=5.56$ , $p=0.005$ , $R^2=0.098$ , $R^2_{\text{adj}}=0.081$   |                                                 |                                                    |                  |                           |              |                         |
| <b>Leak respiration</b> (pmol O <sub>2</sub> /sec per Mio cells)                 | Intercept                                                                                        | 0.94 (0.13)                                     | [0.69, 1.19]                                       | 56.16            |                           | <0.001       | <0.001                  |
|                                                                                  | CM group                                                                                         | 0.06 (0.06)                                     | [-0.06, 0.17]                                      | 1.03             | 0.010                     | 0.314        | 0.428                   |
|                                                                                  | Storage time of cryopreserved cells                                                              | 2.19*10 <sup>-5</sup> (1.13*10 <sup>-4</sup> )  | [-2.02*10 <sup>-4</sup> , 2.46*10 <sup>-4</sup> ]  | 0.04             | <0.001                    | 0.847        | 0.932                   |
|                                                                                  | Overall model statistics†: $F(2,102)=0.62$ , $p=0.542$ , $R^2=0.013$ , $R^2_{\text{adj}}=-0.007$ |                                                 |                                                    |                  |                           |              |                         |
| <b>ATP-turnover-related respiration</b> (pmol O <sub>2</sub> /sec per Mio cells) | Intercept                                                                                        | 3.04 (0.22)                                     | [2.59, 3.48]                                       | 185.61           |                           | <0.001       | <0.001                  |
|                                                                                  | CM group                                                                                         | 0.24 (0.09)                                     | [0.06, 0.42]                                       | 6.87             | 0.051                     | <b>0.010</b> | <b>0.020</b>            |
|                                                                                  | Storage time of cryopreserved cells                                                              | -6.36*10 <sup>-4</sup> (1.96*10 <sup>-4</sup> ) | [-1.02*10 <sup>-3</sup> , -2.47*10 <sup>-4</sup> ] | 10.49            | 0.093                     | 0.002        | 0.005                   |
|                                                                                  | Overall model statistics: $F(2,102)=7.98$ , $p<0.001$ , $R^2=0.135$ , $R^2_{\text{adj}}=0.118$   |                                                 |                                                    |                  |                           |              |                         |
| <b>Maximal respiratory capacity</b> (pmol O <sub>2</sub> /sec per Mio cells)     | Intercept                                                                                        | 5.58 (0.64)                                     | [4.31, 6.85]                                       | 76.04            |                           | <0.001       | <0.001                  |
|                                                                                  | CM group                                                                                         | 0.30 (0.26)                                     | [-0.22, 0.82]                                      | 1.33             | 0.014                     | 0.252        | 0.360                   |
|                                                                                  | Storage time of cryopreserved cells                                                              | 3.14*10 <sup>-4</sup> (5.64*10 <sup>-4</sup> )  | [-8.04*10 <sup>-4</sup> , 1.43*10 <sup>-3</sup> ]  | 0.31             | 0.003                     | 0.579        | 0.695                   |
|                                                                                  | Overall model statistics: $F(2,102)=0.88$ , $p=0.417$ , $R^2=0.017$ , $R^2_{\text{adj}}=-0.002$  |                                                 |                                                    |                  |                           |              |                         |
| <b>Spare respiratory capacity</b> (pmol O <sub>2</sub> /sec per Mio cells)       | Intercept                                                                                        | 1.60 (0.53)                                     | [0.56, 2.65]                                       | 9.24             |                           | 0.003        | 0.007                   |
|                                                                                  | CM group                                                                                         | -0.04 (0.21)                                    | [-0.46, 0.39]                                      | 0.03             | <0.001                    | 0.870        | 0.932                   |
|                                                                                  | Storage time of cryopreserved cells                                                              | 9.22*10 <sup>-4</sup> (4.64*10 <sup>-4</sup> )  | [1.17*10 <sup>-6</sup> , 1.84*10 <sup>-3</sup> ]   | 3.94             | 0.037                     | 0.050        | 0.079                   |
|                                                                                  | Overall model statistics: $F(2,102)=1.97$ , $p=0.144$ , $R^2=0.037$ , $R^2_{\text{adj}}=0.018$   |                                                 |                                                    |                  |                           |              |                         |
| <b>Routine control ratio</b> (%)                                                 | Intercept                                                                                        | 0.69 (0.05)                                     | [0.58, 0.79]                                       | 166.05           |                           | <0.001       | <0.001                  |
|                                                                                  | CM group                                                                                         | 0.02 (0.02)                                     | [-0.03, 0.06]                                      | 0.57             | 0.006                     | 0.450        | 0.587                   |
|                                                                                  | Storage time of cryopreserved cells                                                              | -1.12*10 <sup>-4</sup> (4.69*10 <sup>-5</sup> ) | [-2.05*10 <sup>-4</sup> , -1.89*10 <sup>-5</sup> ] | 5.70             | 0.053                     | 0.019        | 0.034                   |
|                                                                                  | Overall model statistics†: $F(2,102)=2.85$ , $p=0.063$ , $R^2=0.061$ , $R^2_{\text{adj}}=0.042$  |                                                 |                                                    |                  |                           |              |                         |
| <b>Leak control ratio</b> (%)                                                    | Intercept                                                                                        | 0.16 (0.02)                                     | [0.12, 0.20]                                       | 63.47            |                           | <0.001       | <0.001                  |
|                                                                                  | CM group                                                                                         | 4.19*10 <sup>-3</sup> (1.02*10 <sup>-2</sup> )  | [-0.02, 0.02]                                      | 0.17             | 0.002                     | 0.682        | 0.787                   |

|                                                                                                        |                                     |                                                    |                                                       |         |        |              |              |
|--------------------------------------------------------------------------------------------------------|-------------------------------------|----------------------------------------------------|-------------------------------------------------------|---------|--------|--------------|--------------|
|                                                                                                        | Storage time of cryopreserved cells | 1.91*10 <sup>-6</sup><br>(1.84*10 <sup>-5</sup> )  | [3.45*10 <sup>-5</sup> ,<br>3.84*10 <sup>-5</sup> ]   | 0.01    | <0.001 | 0.918        | 0.938        |
| Overall model statistics <sup>†</sup> : $F(2,102)=0.11$ , $p=0.895$ , $R^2=0.003$ , $R^2_{adj}=-0.017$ |                                     |                                                    |                                                       |         |        |              |              |
| <b>Net routine ratio (%)</b>                                                                           | Intercept                           | 0.52 (0.04)                                        | [0.44, 0.59]                                          | 183.69  |        | <0.001       | <0.001       |
|                                                                                                        | CM group                            | 0.01 (0.02)                                        | [-0.02, 0.04]                                         | 0.33    | 0.003  | 0.568        | 0.695        |
|                                                                                                        | Storage time of cryopreserved cells | -1.09*10 <sup>-4</sup><br>(3.32*10 <sup>-5</sup> ) | [-1.75*10 <sup>-4</sup> ,<br>-4.33*10 <sup>-5</sup> ] | 10.81   | 0.096  | 0.001        | 0.003        |
| Overall model statistics <sup>†</sup> : $F(2,102)=5.46$ , $p=0.006$ , $R^2=0.107$ , $R^2_{adj}=0.089$  |                                     |                                                    |                                                       |         |        |              |              |
| <b>Coupling efficiency (%)</b>                                                                         | Intercept                           | 0.79 (0.02)                                        | [0.74, 0.83]                                          | 1209.55 |        | <0.001       | <0.001       |
|                                                                                                        | CM group                            | 8.89*10 <sup>-4</sup> (0.01)                       | [-0.02, 0.02]                                         | 0.006   | <0.001 | 0.938        | 0.938        |
|                                                                                                        | Storage time of cryopreserved cells | -6.98*10 <sup>-5</sup><br>(2.01*10 <sup>-5</sup> ) | [-1.10*10 <sup>-4</sup> ,<br>-3.00*10 <sup>-5</sup> ] | 12.10   | 0.106  | <0.001       | 0.002        |
| Overall model statistics <sup>†</sup> : $F(2,102)=6.06$ , $p=0.003$ , $R^2=0.084$ , $R^2_{adj}=0.066$  |                                     |                                                    |                                                       |         |        |              |              |
| <b>Citrate synthase activity</b><br>( $\mu\text{mol}/\text{min}$ per Mio cells)                        | Intercept                           | 3.26*10 <sup>-3</sup><br>(2.97*10 <sup>-4</sup> )  | [2.67*10 <sup>-3</sup> ,<br>3.85*10 <sup>-3</sup> ]   | 120.07  |        | <0.001       | <0.001       |
|                                                                                                        | CM group                            | 3.71*10 <sup>-4</sup><br>(1.44*10 <sup>-4</sup> )  | [8.50*10 <sup>-5</sup> ,<br>6.57*10 <sup>-4</sup> ]   | 6.62    | 0.061  | <b>0.012</b> | <b>0.023</b> |
|                                                                                                        | Storage time of cryopreserved cells | 4.44*10 <sup>-7</sup><br>(2.59*10 <sup>-7</sup> )  | [-7.01*10 <sup>-8</sup> ,<br>9.58*10 <sup>-7</sup> ]  | 2.93    | 0.028  | 0.090        | 0.135        |
| Overall model statistics <sup>†</sup> : $F(2,102)=4.32$ , $p=0.016$ , $R^2=0.129$ , $R^2_{adj}=0.112$  |                                     |                                                    |                                                       |         |        |              |              |

Significant CM group effects are given in bold. Robust models (<sup>†</sup>) where appropriate. *P*-values were adjusted for multiple comparisons according to the Benjamini-Hochberg procedure (i.e., false discovery rate, FDR) (24). CM: Childhood maltreatment; CM group: CM- and CM+ according the low cut-off criteria for the CTQ (7). CM- group as reference group.

**Table S6.** Results of multiple linear regression analyses concerning associations between CM load and mitochondrial oxygen consumption in mothers accounting for PBMC subcell composition ( $n=98^1$ )

| Outcome variable                                                                                             | Predictor                           | B (SE)                                          | $\beta$ | 95% CI ( $\beta$ ) | t     | $\eta^2_{\text{partial}}$ | p         |
|--------------------------------------------------------------------------------------------------------------|-------------------------------------|-------------------------------------------------|---------|--------------------|-------|---------------------------|-----------|
| <b>Routine respiration</b><br>(pmol O <sub>2</sub> /sec per Mio cells)                                       | Intercept                           | 3.19 (0.46)                                     |         |                    | 6.99  |                           | <0.001*** |
|                                                                                                              | CTQ sum score                       | 0.02 (0.01)                                     | 0.25    | [0.07, 0.42]       | 2.80  | 0.078                     | 0.006**   |
|                                                                                                              | Storage time of cryopreserved cells | -5.97*10 <sup>-4</sup> (2.50*10 <sup>-4</sup> ) | -0.21   | [-0.39, -0.04]     | -2.39 | 0.045                     | 0.019*    |
|                                                                                                              | Lymphocytes (% in whole blood)      | -0.03 (0.01)                                    | -0.27   | [-0.45, -0.09]     | -2.98 | 0.052                     | 0.004**   |
|                                                                                                              | Monocytes (% in whole blood)        | 0.16 (0.04)                                     | 0.39    | [0.21, 0.57]       | 4.34  | 0.168                     | <0.001*** |
| Overall model statistics: $F(4,93)=9.04$ , $p<0.001^{***}$ , $R^2=0.280$ , $R^2_{\text{adj.}}=0.249$         |                                     |                                                 |         |                    |       |                           |           |
| <b>ATP-turnover-related respiration</b><br>(pmol O <sub>2</sub> /sec per Mio cells)                          | Intercept                           | 2.77 (0.35)                                     |         |                    | 7.95  |                           | <0.001*** |
|                                                                                                              | CTQ sum score                       | 0.01 (4.66*10 <sup>-3</sup> )                   | 0.17    | [-0.01, 0.35]      | 1.90  | 0.038                     | 0.061#    |
|                                                                                                              | Storage time of cryopreserved cells | -6.36*10 <sup>-4</sup> (1.90*10 <sup>-3</sup> ) | -0.30   | [-0.49, -0.12]     | -3.34 | 0.093                     | 0.001**   |
|                                                                                                              | Lymphocytes (% in whole blood)      | -0.02 (0.01)                                    | -0.26   | [-0.44, -0.08]     | -2.80 | 0.054                     | 0.006**   |
|                                                                                                              | Monocytes (% in whole blood)        | 0.08 (0.03)                                     | 0.28    | [0.09, 0.46]       | 3.00  | 0.088                     | 0.003**   |
| Overall model statistics: $F(4,93)=6.91$ , $p<0.001^{***}$ , $R^2=0.229$ , $R^2_{\text{adj.}}=0.196$         |                                     |                                                 |         |                    |       |                           |           |
| <b>Citrate synthase activity</b><br>( $\mu\text{mol}/\text{min}$ per Mio cells)                              | Intercept                           | 2.71*10 <sup>-3</sup> (6.50*10 <sup>-4</sup> )  |         |                    | 4.17  |                           | <0.001*** |
|                                                                                                              | CTQ sum score                       | 1.83*10 <sup>-5</sup> (1.12*10 <sup>-5</sup> )  | 0.19    | [-0.04, 0.42]      | 1.63  | 0.028                     | 0.106     |
|                                                                                                              | Storage time of cryopreserved cells | 4.77*10 <sup>-7</sup> (2.87*10 <sup>-7</sup> )  | 0.12    | [-0.02, 0.26]      | 1.88  | 0.029                     | 0.100     |
|                                                                                                              | Lymphocytes (% in whole blood)      | -2.37*10 <sup>-5</sup> (1.20*10 <sup>-5</sup> ) | -0.14   | [-0.27, 0.001]     | -1.98 | 0.040                     | 0.051#    |
|                                                                                                              | Monocytes (% in whole blood)        | 8.43*10 <sup>-5</sup> (4.34*10 <sup>-5</sup> )  | 0.15    | [-0.003, 0.30]     | 1.94  | 0.039                     | 0.055#    |
| Overall model statistics <sup>†</sup> : $F(4,93)=1.71$ , $p=0.154$ , $R^2=0.164$ , $R^2_{\text{adj.}}=0.128$ |                                     |                                                 |         |                    |       |                           |           |

# < 0.10, \* <0.05, \*\*<0.01, \*\*\* <0.001

Multiple linear regression or robust multiple regression (<sup>†</sup>) where appropriate

CTQ: *Childhood Trauma Questionnaire*

B: unstandardized regression coefficient,  $\beta$ : standardized regression coefficient, SE: standard error

<sup>1</sup> Blood counts available from  $n=98$  mothers (CM+ group:  $n=34$ , CM- group:  $n=64$ )

**Table S7.** Results of multiple linear regression analyses concerning associations between CM load and mitochondrial respiration parameters normalized for *citrate synthase* activity in mothers ( $n=105$ )

| Outcome variable                                                                                                     | Predictor                           | <i>B</i> (SE)                                   | $\beta$ | 95%CI ( $\beta$ ) | <i>t</i> | $\eta^2_{\text{partial}}$ | <i>p</i>  |
|----------------------------------------------------------------------------------------------------------------------|-------------------------------------|-------------------------------------------------|---------|-------------------|----------|---------------------------|-----------|
| <b>Routine respiration normalized for <i>citrate synthase</i> activity</b>                                           | Intercept                           | 0.08 (5.23*10 <sup>-3</sup> )                   |         |                   | 14.99    |                           | <0.001*** |
|                                                                                                                      | CTQ sum score                       | -7.12*10 <sup>-5</sup> (5.89*10 <sup>-5</sup> ) | -0.07   | [-0.19, 0.05]     | -1.21    | 0.014                     | 0.230     |
|                                                                                                                      | Storage time of cryopreserved cells | -2.13*10 <sup>-5</sup> (4.16*10 <sup>-6</sup> ) | -0.47   | [-0.65, -0.29]    | -5.13    | 0.205                     | <0.001*** |
| Overall model statistics <sup>†</sup> : $F(2,102)=13.27$ , $p<0.001^{***}$ , $R^2=0.245$ , $R^2_{\text{adj.}}=0.231$ |                                     |                                                 |         |                   |          |                           |           |
| <b>ATP-turnover-related respiration normalized for <i>citrate synthase</i> activity</b>                              | Intercept                           | 0.06 (3.72*10 <sup>-3</sup> )                   |         |                   | 16.44    |                           | <0.001*** |
|                                                                                                                      | CTQ sum score                       | -7.46*10 <sup>-5</sup> (4.29*10 <sup>-5</sup> ) | -0.10   | [-0.21, 0.01]     | -1.74    | 0.029                     | 0.085#    |
|                                                                                                                      | Storage time of cryopreserved cells | -1.96*10 <sup>-5</sup> (2.94*10 <sup>-6</sup> ) | -0.54   | [-0.71, -0.38]    | -6.68    | 0.304                     | <0.001*** |
| Overall model statistics <sup>†</sup> : $F(2,102)=22.85$ , $p<0.001^{***}$ , $R^2=0.323$ , $R^2_{\text{adj.}}=0.310$ |                                     |                                                 |         |                   |          |                           |           |

# < 0.10, \* <0.05, \*\*<0.01, \*\*\* <0.001

Multiple linear regression or robust multiple regression (<sup>†</sup>) where appropriate

CTQ: *Childhood Trauma Questionnaire*

*B*: unstandardized regression coefficient,  $\beta$ : standardized regression coefficient, *SE*: standard error

**Table S8.** Results of ANCOVAs concerning the group comparisons of mitochondrial function and density in newborns of CM- and CM+ women accounting for the storage time of cryopreserved cells and sex of the child as covariates ( $n=104$ )

| Outcome variable                                                                                 | Predictor                           | <i>B</i> (SE)                                      | 95%CI ( <i>B</i> )                                   | <i>F</i> (1,100) | $\eta^2_{\text{partial}}$ | <i>p</i> | <i>p</i> <sub>FDR</sub> |
|--------------------------------------------------------------------------------------------------|-------------------------------------|----------------------------------------------------|------------------------------------------------------|------------------|---------------------------|----------|-------------------------|
| <b>Routine respiration</b> (pmol O <sub>2</sub> /sec per Mio cells)                              | Intercept                           | 2.99 (0.28)                                        | [2.44, 3.54]                                         | 70.51            |                           | <0.001   | <0.001                  |
|                                                                                                  | CM group                            | 0.11 (0.11)                                        | [-0.10, 0.32]                                        | 1.04             | 0.012                     | 0.309    | 0.412                   |
|                                                                                                  | Storage time of cryopreserved cells | 7.71*10 <sup>-5</sup><br>(2.36*10 <sup>-4</sup> )  | [-3.90*10 <sup>-4</sup> ,<br>5.44*10 <sup>-4</sup> ] | 0.11             | <0.001                    | 0.744    | 0.804                   |
|                                                                                                  | Female sex                          | 0.25 (0.11)                                        | [0.04, 0.47]                                         | 5.58             | 0.053                     | 0.020    | 0.053                   |
| Overall model statistics: $F(3,100)=2.27$ , $p=0.085$ , $R^2=0.064$ , $R^2_{\text{adj.}}=0.036$  |                                     |                                                    |                                                      |                  |                           |          |                         |
| <b>Leak respiration</b> (pmol O <sub>2</sub> /sec per Mio cells)                                 | Intercept                           | 0.56 (0.09)                                        | [0.38, 0.73]                                         | 39.50            |                           | <0.001   | <0.001                  |
|                                                                                                  | CM group                            | -0.03 (0.04)                                       | [-0.11, 0.06]                                        | 0.37             | 0.004                     | 0.543    | 0.639                   |
|                                                                                                  | Storage time of cryopreserved cells | 2.70*10 <sup>-4</sup><br>(7.88*10 <sup>-5</sup> )  | [1.13*10 <sup>-4</sup> ,<br>4.26*10 <sup>-4</sup> ]  | 11.74            | 0.105                     | <0.001   | 0.003                   |
|                                                                                                  | Female sex                          | -1.70*10 <sup>-3</sup> (0.04)                      | [-0.08, 0.08]                                        | 0.002            | <0.001                    | 0.966    | 0.966                   |
| Overall model statistics†: $F(3,100)=4.65$ , $p=0.004$ , $R^2=0.095$ , $R^2_{\text{adj.}}=0.068$ |                                     |                                                    |                                                      |                  |                           |          |                         |
| <b>ATP-turnover-related respiration</b> (pmol O <sub>2</sub> /sec per Mio cells)                 | Intercept                           | 2.40 (0.22)                                        | [1.97, 2.84]                                         | 117.69           |                           | <0.001   | <0.001                  |
|                                                                                                  | CM group                            | 0.12 (0.09)                                        | [-0.05, 0.29]                                        | 1.84             | 0.018                     | 0.178    | 0.274                   |
|                                                                                                  | Storage time of cryopreserved cells | -1.70*10 <sup>-4</sup><br>(1.88*10 <sup>-4</sup> ) | [-5.44*10 <sup>-4</sup> ,<br>2.04*10 <sup>-4</sup> ] | 0.81             | 0.020                     | 0.369    | 0.476                   |
|                                                                                                  | Female sex                          | 0.26 (0.09)                                        | [0.09, 0.43]                                         | 9.14             | 0.084                     | 0.003    | 0.009                   |
| Overall model statistics: $F(3,100)=4.34$ , $p=0.006$ , $R^2=0.115$ , $R^2_{\text{adj.}}=0.089$  |                                     |                                                    |                                                      |                  |                           |          |                         |
| <b>Maximal respiratory capacity</b> (pmol O <sub>2</sub> /sec per Mio cells)                     | Intercept                           | 3.97 (0.76)                                        | [2.46, 5.48]                                         | 27.20            |                           | <0.001   | 0.001                   |
|                                                                                                  | CM group                            | 0.37 (0.30)                                        | [-0.22, 0.95]                                        | 1.53             | 0.021                     | 0.219    | 0.313                   |
|                                                                                                  | Storage time of cryopreserved cells | 1.32*10 <sup>-3</sup><br>(6.47*10 <sup>-4</sup> )  | [3.44*10 <sup>-5</sup> ,<br>2.60*10 <sup>-3</sup> ]  | 4.15             | 0.029                     | 0.044    | 0.088                   |
|                                                                                                  | Female sex                          | 0.62 (0.30)                                        | [0.03, 1.21]                                         | 4.42             | 0.042                     | 0.038    | 0.084                   |
| Overall model statistics: $F(3,100)=3.17$ , $p=0.028$ , $R^2=0.087$ , $R^2_{\text{adj.}}=0.060$  |                                     |                                                    |                                                      |                  |                           |          |                         |
| <b>Spare respiratory capacity</b> (pmol O <sub>2</sub> /sec per Mio cells)                       | Intercept                           | 0.61 (0.74)                                        | [-0.26, 2.22]                                        | 0.69             |                           | 0.408    | 0.510                   |
|                                                                                                  | CM group                            | 0.26 (0.24)                                        | [-0.23, 0.74]                                        | 1.11             | 0.017                     | 0.294    | 0.406                   |
|                                                                                                  | Storage time of cryopreserved cells | 1.24*10 <sup>-3</sup><br>(5.31*10 <sup>-4</sup> )  | [1.85*10 <sup>-4</sup> ,<br>2.29*10 <sup>-3</sup> ]  | 5.44             | 0.043                     | 0.022    | 0.055                   |
|                                                                                                  | Female sex                          | 0.37 (0.24)                                        | [-0.11, 0.85]                                        | 2.30             | 0.023                     | 0.132    | 0.211                   |
| Overall model statistics: $F(3,100)=2.81$ , $p=0.043$ , $R^2=0.078$ , $R^2_{\text{adj.}}=0.050$  |                                     |                                                    |                                                      |                  |                           |          |                         |

|                                                                                          |                                     |                                                 |                                                    |         |        |        |        |
|------------------------------------------------------------------------------------------|-------------------------------------|-------------------------------------------------|----------------------------------------------------|---------|--------|--------|--------|
| <b>Routine control ratio (%)</b>                                                         | Intercept                           | 0.72 (0.05)                                     | [0.62, 0.82]                                       | 215.32  |        | <0.001 | <0.001 |
|                                                                                          | CM group                            | -3.97*10 <sup>-3</sup> (0.02)                   | [-0.05, 0.04]                                      | 0.03    | <0.001 | 0.861  | 0.906  |
|                                                                                          | Storage time of cryopreserved cells | -1.27*10 <sup>-4</sup> (4.43*10 <sup>-5</sup> ) | [-2.15*10 <sup>-4</sup> , -3.93*10 <sup>-5</sup> ] | 8.25    | 0.076  | 0.005  | 0.014  |
|                                                                                          | Female sex                          | -0.03 (0.02)                                    | [-0.07, 0.01]                                      | 2.32    | 0.023  | 0.131  | 0.211  |
| Overall model statistics†: $F(3,100)=3.95$ , $p=0.010$ , $R^2=0.084$ , $R^2_{adj}=0.056$ |                                     |                                                 |                                                    |         |        |        |        |
| <b>Leak control ratio (%)</b>                                                            | Intercept                           | 0.15 (0.02)                                     | [0.10, 0.20]                                       | 43.03   |        | <0.001 | <0.001 |
|                                                                                          | CM group                            | -0.01 (0.01)                                    | [-0.03, 0.01]                                      | 1.58    | 0.016  | 0.212  | 0.313  |
|                                                                                          | Storage time of cryopreserved cells | 1.13*10 <sup>-5</sup> (2.07*10 <sup>-5</sup> )  | [-2.98*10 <sup>-5</sup> , 5.24*10 <sup>-5</sup> ]  | 0.30    | 0.003  | 0.586  | 0.670  |
|                                                                                          | Female sex                          | -0.02 (0.01)                                    | [-0.04, 2.06*10 <sup>-3</sup> ]                    | 3.16    | 0.031  | 0.078  | 0.142  |
| Overall model statistics†: $F(3,100)=1.68$ , $p=0.177$ , $R^2=0.054$ , $R^2_{adj}=0.026$ |                                     |                                                 |                                                    |         |        |        |        |
| <b>Net routine ratio (%)</b>                                                             | Intercept                           | 0.56 (0.03)                                     | [0.50, 0.63]                                       | 261.73  |        | <0.001 | <0.001 |
|                                                                                          | CM group                            | 1.89e-03 (0.02)                                 | [-0.03, 0.03]                                      | 0.01    | <0.001 | 0.903  | 0.926  |
|                                                                                          | Storage time of cryopreserved cells | -1.31*10 <sup>-4</sup> (3.09*10 <sup>-5</sup> ) | [-1.93*10 <sup>-4</sup> , -6.99*10 <sup>-5</sup> ] | 18.01   | 0.153  | <0.001 | <0.001 |
|                                                                                          | Female sex                          | -0.01 (0.02)                                    | [-0.04, 0.02]                                      | 0.59    | 0.006  | 0.444  | 0.538  |
| Overall model statistics†: $F(3,100)=6.38$ , $p<0.001$ , $R^2=0.145$ , $R^2_{adj}=0.119$ |                                     |                                                 |                                                    |         |        |        |        |
| <b>Coupling efficiency (%)</b>                                                           | Intercept                           | 0.80 (0.02)                                     | [0.76, 0.85]                                       | 1049.42 |        | <0.001 | <0.001 |
|                                                                                          | CM group                            | 0.01 (0.01)                                     | [-4.20*10 <sup>-3</sup> , 0.03]                    | 2.40    | 0.017  | 0.125  | 0.211  |
|                                                                                          | Storage time of cryopreserved cells | -7.71*10 <sup>-5</sup> (2.11*10 <sup>-5</sup> ) | [-1.19*10 <sup>-4</sup> , -3.52*10 <sup>-5</sup> ] | 13.32   | 0.141  | <0.001 | 0.002  |
|                                                                                          | Female sex                          | 0.02 (0.01)                                     | [9.00*10 <sup>-4</sup> , 0.04]                     | 4.32    | 0.041  | 0.040  | 0.084  |
| Overall model statistics: $F(3,100)=7.46$ , $p<0.001$ , $R^2=0.183$ , $R^2_{adj}=0.158$  |                                     |                                                 |                                                    |         |        |        |        |
| <b>Citrate synthase activity (μmol/min per Mio cells)</b>                                | Intercept                           | 2.79*10 <sup>-3</sup> (2.34*10 <sup>-4</sup> )  | [2.33*10 <sup>-3</sup> , 3.26*10 <sup>-3</sup> ]   | 142.16  |        | <0.001 | <0.001 |
|                                                                                          | CM group                            | 1.67*10 <sup>-4</sup> (9.10*10 <sup>-5</sup> )  | [-1.39*10 <sup>-5</sup> , 3.47*10 <sup>-4</sup> ]  | 3.35    | 0.039  | 0.070  | 0.133  |
|                                                                                          | Storage time of cryopreserved cells | 4.35*10 <sup>-7</sup> (1.99*10 <sup>-7</sup> )  | [4.01*10 <sup>-8</sup> , 8.30*10 <sup>-7</sup> ]   | 4.78    | 0.049  | 0.031  | 0.073  |
|                                                                                          | Female sex                          | -3.24*10 <sup>-5</sup> (9.10*10 <sup>-5</sup> ) | [-2.13*10 <sup>-4</sup> , 1.48*10 <sup>-4</sup> ]  | 0.13    | 0.001  | 0.722  | 0.802  |
| Overall model statistics: $F(3,100)=3.12$ , $p=0.029$ , $R^2=0.086$ , $R^2_{adj}=0.058$  |                                     |                                                 |                                                    |         |        |        |        |

Robust models (†) where appropriate. *P*-values were adjusted for multiple comparisons according to the Benjamini-Hochberg procedure (i.e., false discovery rate, FDR) (24). CM: Childhood maltreatment; CM group: CM- and CM+ according the low cut-off criteria for the CTQ (7). CM- group as reference group.



**Table S9.** Results of multiple linear regression analyses concerning associations between CM load and mitochondrial oxygen consumption in newborns accounting for UBMC subcell composition ( $n=84^1$ )

| Outcome variable                                                                    | Predictor                                                                                          | <i>B</i> ( <i>SE</i> )                          | $\beta$ | 95%CI ( $\beta$ ) | <i>t</i> | $\eta^2_{\text{partial}}$ | <i>p</i>           |
|-------------------------------------------------------------------------------------|----------------------------------------------------------------------------------------------------|-------------------------------------------------|---------|-------------------|----------|---------------------------|--------------------|
| <b>Routine respiration</b><br>(pmol O <sub>2</sub> /sec per Mio cells)              | Intercept                                                                                          | 2.67 (0.46)                                     |         |                   | 5.79     |                           | <0.001***          |
|                                                                                     | CTQ sum score                                                                                      | -1.86*10 <sup>-3</sup> (5.84*10 <sup>-3</sup> ) | -0.03   | [-0.25, 0.18]     | -0.32    | <0.001                    | 0.751              |
|                                                                                     | Storage time of cryopreserved cells                                                                | 1.65*10 <sup>-4</sup> (2.52*10 <sup>-4</sup> )  | 0.07    | [-0.15, 0.29]     | 0.65     | 0.001                     | 0.515              |
|                                                                                     | Female sex                                                                                         | 0.35 (0.12)                                     | 0.33    | [0.11, 0.55]      | 3.02     | 0.104                     | 0.003**            |
|                                                                                     | Lymphocytes (% in whole blood)                                                                     | 2.36*10 <sup>-3</sup> (7.75*10 <sup>-3</sup> )  | 0.03    | [-0.18, 0.25]     | 0.31     | 0.001                     | 0.761              |
|                                                                                     | Monocytes (% in whole blood)                                                                       | 0.02 (0.02)                                     | 0.11    | [-0.11, 0.33]     | 1.01     | 0.012                     | 0.317              |
|                                                                                     | Overall model statistics: $F(5,78)=2.04$ , $p=0.082^{\#}$ , $R^2=0.116$ , $R^2_{\text{adj}}=0.059$ |                                                 |         |                   |          |                           |                    |
| <b>ATP-turnover-related respiration</b><br>(pmol O <sub>2</sub> /sec per Mio cells) | Intercept                                                                                          | 2.19 (0.38)                                     |         |                   | 5.76     |                           | <0.001***          |
|                                                                                     | CTQ sum score                                                                                      | -1.77*10 <sup>-3</sup> (4.80*10 <sup>-3</sup> ) | -0.04   | [-0.25, 0.17]     | -0.37    | <0.001                    | 0.714              |
|                                                                                     | Storage time of cryopreserved cells                                                                | -5.51*10 <sup>-5</sup> (2.07*10 <sup>-4</sup> ) | -0.03   | [-0.24, 0.19]     | -0.27    | 0.010                     | 0.791              |
|                                                                                     | Female sex                                                                                         | 0.33 (0.09)                                     | 0.38    | [0.17, 0.60]      | 3.52     | 0.135                     | <0.001***          |
|                                                                                     | Lymphocytes (% in whole blood)                                                                     | 3.55*10 <sup>-3</sup> (6.38*10 <sup>-3</sup> )  | 0.06    | [-0.15, 0.27]     | 0.56     | 0.004                     | 0.579              |
|                                                                                     | Monocytes (% in whole blood)                                                                       | 6.85*10 <sup>-3</sup> (0.02)                    | 0.04    | [-0.17, 0.25]     | 0.36     | 0.001                     | 0.722              |
|                                                                                     | Overall model statistics: $F(5,78)=2.67$ , $p=0.028^*$ , $R^2=0.146$ , $R^2_{\text{adj}}=0.091$    |                                                 |         |                   |          |                           |                    |
| <b>Citrate synthase activity</b><br>( $\mu\text{mol}/\text{min}$ per Mio cells)     | Intercept                                                                                          | 2.22*10 <sup>-3</sup> (3.96*10 <sup>-4</sup> )  |         |                   | 5.61     |                           | <0.001***          |
|                                                                                     | CTQ sum score                                                                                      | -9.82*10 <sup>-7</sup> (5.01*10 <sup>-6</sup> ) | -0.02   | [-0.23, 0.19]     | -0.20    | <0.001                    | 0.845              |
|                                                                                     | Storage time of cryopreserved cells                                                                | 4.30*10 <sup>-7</sup> (2.16*10 <sup>-7</sup> )  | 0.22    | [-0.00, 0.43]     | 1.99     | 0.075                     | 0.050 <sup>#</sup> |
|                                                                                     | Female sex                                                                                         | -4.07*10 <sup>-6</sup> (9.90*10 <sup>-5</sup> ) | -0.004  | [-0.22, 0.21]     | -0.04    | <0.001                    | 0.967              |
|                                                                                     | Lymphocytes (% in whole blood)                                                                     | 6.35*10 <sup>-6</sup> (6.65*10 <sup>-6</sup> )  | 0.10    | [-0.11, 0.31]     | 0.96     | 0.012                     | 0.342              |
|                                                                                     | Monocytes (% in whole blood)                                                                       | 5.27*10 <sup>-5</sup> (2.01*10 <sup>-5</sup> )  | 0.28    | [0.07, 0.49]      | 2.63     | 0.079                     | 0.010*             |
|                                                                                     | Overall model statistics: $F(5,78)=2.78$ , $p=0.023^*$ , $R^2=0.151$ , $R^2_{\text{adj}}=0.097$    |                                                 |         |                   |          |                           |                    |

<sup>#</sup> < 0.10, \* <0.05, \*\*<0.01, \*\*\* <0.001

Multiple linear regression or robust multiple regression (†) where appropriate

CTQ: *Childhood Trauma Questionnaire*

*B*: unstandardized regression coefficient,  $\beta$ : standardized regression coefficient, *SE*: standard error

<sup>1</sup> Blood counts available from  $n=84$  newborns (CM- group:  $n=54$ , CM+ group:  $n=30$ )

**Table S10.** Results of multiple linear regression analyses concerning associations between CM load and mitochondrial oxygen consumption in newborns additionally accounting for newborns gestational age and birth weight ( $n=104$ )

| Outcome variable                                                                        | Predictor                                                                                       | <i>B</i> ( <i>SE</i> )                           | $\beta$ | 95%CI ( $\beta$ ) | <i>t</i> | $\eta^2_{\text{partial}}$ | <i>p</i>             |
|-----------------------------------------------------------------------------------------|-------------------------------------------------------------------------------------------------|--------------------------------------------------|---------|-------------------|----------|---------------------------|----------------------|
| <b>Routine respiration</b><br>( $\mu\text{mol O}_2/\text{sec}$ per Mio cells)           | Intercept                                                                                       | 3.28 (1.73)                                      |         |                   | 1.90     |                           | 0.060 <sup>#</sup>   |
|                                                                                         | CTQ sum score                                                                                   | $3.26 \times 10^{-3}$ ( $5.09 \times 10^{-3}$ )  | 0.06    | [-0.13, 0.26]     | 0.64     | 0.008                     | 0.524                |
|                                                                                         | Storage time of cryopreserved cells                                                             | $1.08 \times 10^{-4}$ ( $2.38 \times 10^{-4}$ )  | 0.05    | [-0.15, 0.24]     | 0.46     | <0.001                    | 0.650                |
|                                                                                         | Female sex                                                                                      | 0.24 (0.11)                                      | 0.22    | [0.02, 0.43]      | 2.18     | 0.053                     | 0.032 <sup>*</sup>   |
|                                                                                         | Gestational age                                                                                 | $-4.36 \times 10^{-4}$ ( $6.35 \times 10^{-3}$ ) | -0.01   | [-0.21, 0.20]     | -0.07    | 0.001                     | 0.945                |
|                                                                                         | Birth weight                                                                                    | $-7.78 \times 10^{-5}$ ( $1.20 \times 10^{-4}$ ) | -0.07   | [-0.28, 0.14]     | -0.65    | 0.004                     | 0.520                |
|                                                                                         | Overall model statistics: $F(5,98)=1.34$ , $p=0.255$ , $R^2=0.064$ , $R^2_{\text{adj}}=0.016$   |                                                  |         |                   |          |                           |                      |
| <b>ATP-turnover-related respiration</b> ( $\mu\text{mol O}_2/\text{sec}$ per Mio cells) | Intercept                                                                                       | 2.99 (1.39)                                      |         |                   | 2.16     |                           | 0.033 <sup>*</sup>   |
|                                                                                         | CTQ sum score                                                                                   | $3.61 \times 10^{-3}$ ( $4.08 \times 10^{-3}$ )  | 0.09    | [-0.11, 0.28]     | 0.89     | 0.012                     | 0.378                |
|                                                                                         | Storage time of cryopreserved cells                                                             | $-1.43 \times 10^{-4}$ ( $1.91 \times 10^{-4}$ ) | -0.07   | [-0.26, 0.12]     | -0.75    | 0.017                     | 0.456                |
|                                                                                         | Female sex                                                                                      | 0.26 (0.09)                                      | 0.29    | [0.09, 0.49]      | 2.89     | 0.083                     | 0.005 <sup>**</sup>  |
|                                                                                         | Gestational age                                                                                 | $-2.24 \times 10^{-3}$ ( $5.10 \times 10^{-3}$ ) | -0.04   | [-0.24, 0.15]     | -0.44    | 0.003                     | 0.662                |
|                                                                                         | Birth weight                                                                                    | $-1.89 \times 10^{-5}$ ( $9.66 \times 10^{-5}$ ) | -0.02   | [-0.22, 0.18]     | -0.20    | <0.001                    | 0.845                |
|                                                                                         | Overall model statistics: $F(5,98)=2.42$ , $p=0.041^*$ , $R^2=0.110$ , $R^2_{\text{adj}}=0.064$ |                                                  |         |                   |          |                           |                      |
| <b>Citrate synthase activity</b><br>( $\mu\text{mol}/\text{min}$ per Mio cells)         | Intercept                                                                                       | $4.94 \times 10^{-3}$ ( $1.46 \times 10^{-3}$ )  |         |                   | 3.38     |                           | 0.001 <sup>***</sup> |
|                                                                                         | CTQ sum score                                                                                   | $8.90 \times 10^{-7}$ ( $4.31 \times 10^{-6}$ )  | 0.02    | [-0.17, 0.21]     | 0.21     | 0.002                     | 0.837                |
|                                                                                         | Storage time of cryopreserved cells                                                             | $4.91 \times 10^{-7}$ ( $2.02 \times 10^{-7}$ )  | 0.24    | [0.04, 0.44]      | 2.44     | 0.056                     | 0.017 <sup>*</sup>   |
|                                                                                         | Female sex                                                                                      | $-3.92 \times 10^{-5}$ ( $9.36 \times 10^{-5}$ ) | -0.04   | [-0.24, 0.16]     | -0.42    | 0.001                     | 0.677                |
|                                                                                         | Gestational age                                                                                 | $-7.19 \times 10^{-6}$ ( $5.39 \times 10^{-6}$ ) | -0.14   | [-0.34, 0.07]     | -1.33    | 0.024                     | 0.185                |
|                                                                                         | Birth weight                                                                                    | $-5.07 \times 10^{-8}$ ( $1.02 \times 10^{-7}$ ) | -0.05   | [-0.26, 0.15]     | -0.50    | 0.003                     | 0.620                |
|                                                                                         | Overall model statistics: $F(5,98)=1.72$ , $p=0.136$ , $R^2=0.081$ , $R^2_{\text{adj}}=0.034$   |                                                  |         |                   |          |                           |                      |

# < 0.10, \* <0.05, \*\*<0.01, \*\*\* <0.001

Multiple linear regression or robust multiple regression (<sup>†</sup>) where appropriate

CTQ: *Childhood Trauma Questionnaire*

*B*: unstandardized regression coefficient,  $\beta$ : standardized regression coefficient, *SE*: standard error

**Table S11.** Results of multiple linear regression analyses concerning associations between CM load and mitochondrial respiration normalized for *citrate synthase* activity in newborns ( $n=104$ )

| Outcome variable                                                                                                   | Predictor                           | <i>B</i> ( <i>SE</i> )                          | $\beta$ | 95% CI ( $\beta$ ) | <i>t</i> | $\eta^2_{\text{partial}}$ | <i>p</i>  |
|--------------------------------------------------------------------------------------------------------------------|-------------------------------------|-------------------------------------------------|---------|--------------------|----------|---------------------------|-----------|
| <b>Routine respiration normalized for <i>citrate synthase</i> activity</b>                                         | Intercept                           | 0.06 (6.23*10 <sup>-3</sup> )                   |         |                    | 10.02    |                           | <0.001*** |
|                                                                                                                    | CTQ sum score                       | 1.55*10 <sup>-5</sup> (6.87*10 <sup>-5</sup> )  | 0.02    | [-0.13, 0.16]      | 0.23     | 0.001                     | 0.822     |
|                                                                                                                    | Storage time of cryopreserved cells | -5.88*10 <sup>-6</sup> (4.19*10 <sup>-6</sup> ) | -0.13   | [-0.32, 0.06]      | -1.40    | 0.019                     | 0.164     |
|                                                                                                                    | Female sex                          | 5.16*10 <sup>-3</sup> (2.00*10 <sup>-3</sup> )  | 0.26    | [0.06, 0.46]       | 2.59     | 0.063                     | 0.011*    |
| Overall model statistics <sup>†</sup> : $F(3,100)=4.74$ , $p=0.004^{**}$ , $R^2=0.099$ , $R^2_{\text{adj.}}=0.072$ |                                     |                                                 |         |                    |          |                           |           |
| <b>ATP-turnover-related respiration normalized for <i>citrate synthase</i> activity</b>                            | Intercept                           | 0.05 (4.74*10 <sup>-3</sup> )                   |         |                    | 10.78    |                           | <0.001*** |
|                                                                                                                    | CTQ sum score                       | 1.54*10 <sup>-5</sup> (7.47*10 <sup>-5</sup> )  | 0.02    | [-0.16, 0.20]      | 0.21     | 0.001                     | 0.837     |
|                                                                                                                    | Storage time of cryopreserved cells | -9.36*10 <sup>-6</sup> (3.51*10 <sup>-6</sup> ) | -0.25   | [-0.43, -0.06]     | -2.67    | 0.094                     | 0.009**   |
|                                                                                                                    | Female sex                          | 5.05*10 <sup>-3</sup> (1.61*10 <sup>-3</sup> )  | 0.30    | [0.11, 0.48]       | 3.13     | 0.089                     | 0.002**   |
| Overall model statistics: $F(3,100)=6.76$ , $p<0.001^{***}$ , $R^2=0.169$ , $R^2_{\text{adj.}}=0.144$              |                                     |                                                 |         |                    |          |                           |           |

# < 0.10, \* <0.05, \*\*<0.01, \*\*\* <0.001

Multiple linear regression or robust multiple regression (†) where appropriate

CTQ: *Childhood Trauma Questionnaire*

*B*: unstandardized regression coefficient,  $\beta$ : standardized regression coefficient, *SE*: standard error

## SI References

1. A. M. Koenig, *et al.*, Altered hair endocannabinoid levels in mothers with childhood maltreatment and their newborns. *Biol. Psychol.* **135**, 93–101 (2018).
2. A. M. Koenig, *et al.*, Intergenerational gene x environment interaction of FKBP5 and childhood maltreatment on hair steroids. *Psychoneuroendocrinology* **92**, 103–112 (2018).
3. World Medical Association Declaration of Helsinki: Ethical Principles for Medical Research Involving Human Subjects. *JAMA* **310**, 2191 (2013).
4. K. Bader, C. Hännny, V. Schäfer, A. Neuckel, C. Kuhl, Childhood Trauma Questionnaire – Psychometrische Eigenschaften einer deutschsprachigen Version. *Z. Für Klin. Psychol. Psychother.* **38**, 223–230 (2009).
5. D. P. Bernstein, L. Fink, *Childhood trauma questionnaire: A retrospective self-report: Manual* (Harcourt Brace & Company, 1998).
6. K. Schury, I.-T. Kolassa, Biological memory of childhood maltreatment: current knowledge and recommendations for future research: Biological memory of childhood maltreatment. *Ann. N. Y. Acad. Sci.* **1262**, 93–100 (2012).
7. D. Bernstein, L. Fink, Manual for the childhood trauma questionnaire. *N. Y. Psychol. Corp.* (1998).
8. E. M. Widen, D. Gallagher, Body composition changes in pregnancy: measurement, predictors and outcomes. *Eur. J. Clin. Nutr.* **68**, 643–652 (2014).
9. P. Soma-Pillay, C. Nelson-Piercy, H. Tolppanen, A. Mebazaa, Physiological changes in pregnancy. *Cardiovasc. J. Afr.* **27**, 89–94 (2016).
10. M. Fasching, M. Fontana-Ayoub, E. Gnaiger, Mitochondrial respiration medium-MiR06. *Mitochondr Physiol Netw.* **14**, 1 (2014).
11. D. Pesta, E. Gnaiger, “High-Resolution Respirometry: OXPHOS Protocols for Human Cells and Permeabilized Fibers from Small Biopsies of Human Muscle” in *Mitochondrial Bioenergetics: Methods and Protocols*, C. M. Palmeira, A. J. Moreno, Eds. (Humana Press, 2012), pp. 25–58.
12. E. Gnaiger, Mitochondrial pathways and respiratory control. *Introd. OXPHOS Anal. 4th Ed Mitochondr Physiol Netw.* **19**, 80 (2007).
13. A. Karabatsiakos, *et al.*, Mitochondrial respiration in peripheral blood mononuclear cells correlates with depressive subsymptoms and severity of major depression. *Transl. Psychiatry* **4**, e397–e397 (2014).
14. A. Eigentler, *et al.*, Laboratory protocol: citrate synthase a mitochondrial marker enzyme. *Mitochondrial Physiol. Netw.* **17**, 1–11 (2012).
15. M. Picard, *et al.*, A Mitochondrial Health Index Sensitive to Mood and Caregiving Stress. *Biol. Psychiatry* **84**, 9–17 (2018).
16. J. K. Ehinger, S. Morota, M. J. Hansson, G. Paul, E. Elmer, Mitochondrial dysfunction in blood cells from amyotrophic lateral sclerosis patients. *J. Neurol.* **262**, 1493–1503 (2015).

17. S. Larsen, *et al.*, Biomarkers of mitochondrial content in skeletal muscle of healthy young human subjects. *J. Physiol.* **590**, 3349–3360 (2012).
18. K. N. Keane, E. K. Calton, V. F. Cruzat, M. J. Soares, P. Newsholme, The impact of cryopreservation on human peripheral blood leucocyte bioenergetics. *Clin. Sci.* **128**, 723–733 (2015).
19. D. Nicholas, *et al.*, Advances in the quantification of mitochondrial function in primary human immune cells through extracellular flux analysis. *PLOS ONE* **12**, e0170975 (2017).
20. B. K. Chacko, *et al.*, Methods for defining distinct bioenergetic profiles in platelets, lymphocytes, monocytes, and neutrophils, and the oxidative burst from human blood. *Lab. Invest.* **93**, 690–700 (2013).
21. P. A. Kramer, S. Ravi, B. Chacko, M. S. Johnson, V. M. Darley-Usmar, A review of the mitochondrial and glycolytic metabolism in human platelets and leukocytes: Implications for their use as bioenergetic biomarkers. *Redox Biol.* **2**, 206–210 (2014).
22. A. P. Field, R. R. Wilcox, Robust statistical methods: A primer for clinical psychology and experimental psychopathology researchers. *Behav. Res. Ther.* **98**, 19–38 (2017).
23. M. Maechler, *et al.*, robustbase: Basic Robust Statistics R package version 0.93-5 (2019).
24. Y. Benjamini, Y. Hochberg, Controlling the false discovery rate: a practical and powerful approach to multiple testing. *J. R. Stat. Soc. Ser. B Methodol.* **57**, 289–300 (1995).
